# Supplementary material for: Leveraging structural and 2D-QSAR to investigate the role of functional group substitutions, conserved surface residues and desolvation in triggering the small molecule-induced dimerization of hPD-L1
Source: BMC Chem. 2022 Jun 27;16(1):49. doi: 10.1186/s13065-022-00842-w (PMC9238240; doi:10.1186/s13065-022-00842-w)
Supplement: Supplementary file 2 — Additional file 2. Supplementary material [file 13065_2022_842_MOESM2_ESM.csv]

	Ligand SMILES	BindingDB Reactant_set_id	p_ic50
705794	Cc1c(COc2ccc(CNC[C@@H](O)CC(O)=O)c(OCc3cccc(c3)C#N)c2)cccc1-c1ccccc1	719159	8.275724130399212
705795	C[C@H](O)[C@H](NCc1ccc(OCc2cccc(c2C)-c2ccccc2)cc1OCc1cccc(c1)C#N)C(O)=O	719160	6.259637310505756
705796	C[C@@H](O)[C@@H](NCc1ccc(OCc2cccc(c2C)-c2ccccc2)cc1OCc1cccc(c1)C#N)C(O)=O	719161	8.275724130399212
705797	Cc1c(COc2ccc(CNC(C)(CO)C(O)=O)c(OCc3cccc(c3)C#N)c2)cccc1-c1ccccc1	719162	8.275724130399212
705798	C[C@H](O)[C@@H](NCc1ccc(OCc2cccc(c2C)-c2ccccc2)cc1OCc1cccc(c1)C#N)C(O)=O	719163	8.275724130399212
705799	Cc1c(COc2ccc(CN[C@H](CO)C(O)=O)c(OCc3cccc(c3)C#N)c2)cccc1-c1ccccc1	719164	8.341988603342887
705800	Cc1c(COc2ccc(CNC(CO)C(O)=O)c(OCc3cccc(c3)C#N)c2)cccc1-c1ccccc1	719165	8.275724130399212
705801	Cc1c(COc2ccc(CN[C@@H](CO)C(O)=O)c(OCc3cccc(c3)C#N)c2)cccc1-c1ccccc1	719166	8.275724130399212
705802	Cc1c(COc2ccc(CN[C@@](C)(CO)C(O)=O)c(OCc3cccc(c3)C#N)c2)cccc1-c1ccccc1	719167	8.275724130399212
705803	CC(C)C(CO)(NCc1ccc(OCc2cccc(c2C)-c2ccccc2)cc1OCc1cccc(c1)C#N)C(O)=O	719168	6.259637310505756
705804	Cc1c(COc2ccc(CN[C@H](CO)CC(O)=O)c(OCc3cccc(c3)C#N)c2)cccc1-c1ccccc1	719169	8.275724130399212
705805	Cc1c(COc2ccc(CN[C@@H](CO)CC(O)=O)c(OCc3cccc(c3)C#N)c2)cccc1-c1ccccc1	719170	8.275724130399212
705806	Cc1c(COc2ccc(CN[C@](C)(CO)C(O)=O)c(OCc3cccc(c3)C#N)c2)cccc1-c1ccccc1	719171	8.275724130399212
705807	CC(=O)NCCNCc1ccc(OCc2cccc(c2C)-c2ccccc2)cc1OCc1ccccc1	719172	4.997833938243492
705808	CC(=O)NCCNCc1ccc(OCc2cccc(c2C)-c2ccccc2)cc1OCc1cccc(C)c1	719173	4.997833938243492
705809	CC(=O)NCCNCc1ccc(OCc2cccc(c2C)-c2ccccc2)cc1OCC(F)(F)F	719174	4.997833938243492
705810	CCCOc1cc(OCc2cccc(c2C)-c2ccccc2)ccc1CNCCNC(C)=O	719175	4.997833938243492
705811	CC(=O)NCCNCc1ccc(OCc2cccc(c2C)-c2ccccc2)cc1OCc1cccc(c1)C#N	719176	6.259637310505756
705812	CC(=O)NCCNCc1ccc(OCc2cccc(c2C)-c2ccccc2)cc1OCc1ccc(cc1)C#N	719177	4.997833938243492
705813	CC(=O)NCCNCc1ccc(OCc2cccc(c2C)-c2ccccc2)cc1OCCO	719178	4.997833938243492
705814	CC(=O)NCCNCc1ccc(OCc2cccc(c2C)-c2ccccc2)cc1OCC(N)=O	719179	4.997833938243492
705815	COC(=O)CCCCOc1cc(OCc2cccc(c2C)-c2ccccc2)ccc1CNCCNC(C)=O	719180	4.997833938243492
705816	CC(=O)NCCNCc1ccc(OCc2cccc(c2C)-c2ccccc2)cc1OCCc1ccccc1	719181	4.997833938243492
705817	COC(=O)c1cccc(COc2cc(OCc3cccc(c3C)-c3ccccc3)ccc2CNCCNC(C)=O)c1	719182	4.997833938243492
705818	CC(=O)NCCNCc1ccc(OCc2cccc(c2C)-c2ccccc2)cc1OCCCO	719183	4.997833938243492
705819	COC(=O)CCCOc1cc(OCc2cccc(c2C)-c2ccccc2)ccc1CNCCNC(C)=O	719184	4.997833938243492
705820	CC(=O)NCCNCc1ccc(OCc2cccc(c2C)-c2ccccc2)cc1OCc1cccc(CO)c1	719185	4.997833938243492
705821	CC(=O)NCCNCc1ccc(OCc2cccc(c2C)-c2ccccc2)cc1OCc1ccccc1CO	719186	4.997833938243492
705822	CC(=O)NCCNCc1ccc(OCc2cccc(c2C)-c2ccccc2)cc1OCc1ccc(cc1)C(N)=O	719187	4.997833938243492
705823	CC(=O)NCCNCc1ccc(OCc2cccc(c2C)-c2ccccc2)cc1OCc1ccc(cc1)C(C)=O	719188	4.997833938243492
705824	CC(=O)NCCNCc1ccc(OCc2cccc(c2C)-c2ccccc2)cc1OCc1ccccc1S(C)(=O)=O	719189	4.997833938243492
705825	COCCCOc1cc(OCc2cccc(c2C)-c2ccccc2)ccc1CNCCNC(C)=O	719190	4.997833938243492
705826	CC(=O)NCCNCc1ccc(OCc2cccc(c2C)-c2ccccc2)cc1OCc1ccc(cc1)C(O)=O	719191	6.621602099051862
705827	CCOc1cc(OCc2cccc(c2C)-c2ccccc2)ccc1CNCCNC(C)=O	719192	4.997833938243492
705828	CC(=O)NCCNCc1ccc(OCc2cccc(c2C)-c2ccccc2)cc1OCc1ccccc1C	719193	4.997833938243492
705829	CC(=O)NCCNCc1ccc(OCc2cccc(c2C)-c2ccccc2)cc1OCc1ccc(cc1)C(C)(C)C	719194	4.997833938243492
705830	CC(=O)NCCNCc1ccc(OCc2cccc(c2C)-c2ccccc2)cc1OCc1ccc(C)cc1	719195	4.997833938243492
705831	CC(=O)NCCNCc1ccc(OCc2cccc(c2C)-c2ccccc2)cc1OCc1ccccc1F	719196	4.997833938243492
705832	CC(=O)NCCNCc1ccc(OCc2cccc(c2C)-c2ccccc2)cc1OCc1c(F)cccc1F	719197	4.997833938243492
705833	CC(=O)NCCNCc1ccc(OCc2cccc(c2C)-c2ccccc2)cc1OCc1cccc(F)c1	719198	4.997833938243492
705834	CC(=O)NCCNCc1ccc(OCc2cccc(c2C)-c2ccccc2)cc1OCc1cccc(c1)C(F)(F)F	719199	4.997833938243492
705835	CC(=O)NCCNCc1ccc(OCc2cccc(c2C)-c2ccccc2)cc1OCc1ccc(cc1)C(F)(F)F	719200	4.997833938243492
705836	CC(=O)NCCNCc1ccc(OCc2cccc(c2C)-c2ccccc2)cc1OCc1ccccc1Cl	719201	4.997833938243492
705837	CC(=O)NCCNCc1ccc(OCc2cccc(c2C)-c2ccccc2)cc1OCc1cccc(Cl)c1	719202	4.997833938243492
705838	CC(=O)NCCNCc1ccc(OCc2cccc(c2C)-c2ccccc2)cc1OCc1ccccc1C#N	719203	4.997833938243492
705839	CC(=O)NCCNCc1ccc(OCc2cccc(c2C)-c2ccccc2)cc1OCc1ccc2ccccc2c1	719204	4.997833938243492
705840	CC(=O)NCCNCc1ccc(OCc2cccc(c2C)-c2ccccc2)cc1OCc1ccccc1[N+]([O-])=O	719205	6.006123085058788
705841	CC(=O)NCCNCc1ccc(OCc2cccc(c2C)-c2ccccc2)cc1OCc1ccc(cc1)[N+]([O-])=O	719206	4.997833938243492
705842	CC(=O)NCCNCc1ccc(OCc2cccc(c2C)-c2ccccc2)cc1OCc1ccc(F)c(F)c1	719207	4.997833938243492
705843	CC(=O)NCCNCc1ccc(OCc2cccc(c2C)-c2ccccc2)cc1OCc1cc(F)ccc1F	719208	4.997833938243492
705844	CC(=O)NCCNCc1ccc(OCc2cccc(c2C)-c2ccccc2)cc1OCc1cc(cc(c1)C(F)(F)F)C(F)(F)F	719209	4.997833938243492
705845	CC(=O)NCCNCc1ccc(OCc2cccc(c2C)-c2ccccc2)cc1OCc1cc(F)cc(F)c1	719210	4.997833938243492
705846	CC(=O)NCCNCc1ccc(OCc2cccc(c2C)-c2ccccc2)cc1OCc1cccc2ccccc12	719211	4.997833938243492
705847	CC(=O)NCCNCc1ccc(OCc2cccc(c2C)-c2ccccc2)cc1OCc1ccc(F)cc1F	719212	4.997833938243492
705848	CC(=O)NCCNCc1ccc(OCc2cccc(c2C)-c2ccccc2)cc1OCc1cc(C)cc(C)c1	719213	4.997833938243492
705849	CC(=O)NCCNCc1ccc(OCc2cccc(c2C)-c2ccccc2)cc1OCc1ccccc1C(F)(F)F	719214	4.997833938243492
705850	COC(=O)c1ccc(COc2cc(OCc3cccc(c3C)-c3ccccc3)ccc2CNCCNC(C)=O)cc1	719215	4.997833938243492
705851	CC(=O)NCCNCc1ccc(OCc2cccc(c2C)-c2ccccc2)cc1OCc1ccc(Cl)cc1	719216	4.997833938243492
705852	CC(=O)NCCNCc1ccc(OCc2cccc(c2C)-c2ccccc2)cc1OCc1ccc(Cl)c(Cl)c1	719217	4.997833938243492
705853	CC(=O)NCCNCc1ccc(OCc2cccc(c2C)-c2ccccc2)cc1OCc1cccc(C)c1F	719218	4.997833938243492
705854	CC(=O)NCCNCc1ccc(OCc2cccc(c2C)-c2ccccc2)cc1OCc1cccc(F)c1F	719219	4.997833938243492
705855	CC(=O)NCCNCc1ccc(OCc2cccc(c2C)-c2ccccc2)cc1OCc1cccc(Cl)c1F	719220	4.997833938243492
705856	CC(=O)NCCNCc1ccc(OCc2cccc(c2C)-c2ccccc2)cc1OCc1cccc(c1)C(=O)c1ccccc1	719221	4.997833938243492
705857	CC(=O)NCCNCc1ccc(OCc2cccc(c2C)-c2ccccc2)cc1OCc1cccc2cccnc12	719222	4.997833938243492
705858	CC(=O)NCCNCc1ccc(OCc2cccc(c2C)-c2ccccc2)cc1OCc1ccc(F)cc1	719223	4.997833938243492
705859	CC(=O)NCCNCc1ccc(OCc2cccc(c2C)-c2ccccc2)cc1OCc1cccc(c1)[N+]([O-])=O	719224	6.259637310505756
705860	CC(=O)NCCNCc1ccc(OCc2cccc(c2C)-c2ccccc2)cc1OCc1cccc(Oc2ccccc2F)c1	719225	4.997833938243492
705861	CC(=O)NCCNCc1ccc(OCc2cccc(c2C)-c2ccccc2)cc1OCc1cccc(Oc2ccc(F)cc2)c1	719226	4.997833938243492
705863	CC(=O)NCCNCc1ccc(OCc2cccc(c2C)-c2ccccc2)cc1OCc1cc(ccc1F)C(F)(F)F	719228	4.997833938243492
705864	CC(=O)NCCNCc1ccc(OCc2cccc(c2C)-c2ccccc2)cc1OCc1cc(F)cc(c1)C(F)(F)F	719229	4.997833938243492
705865	CC(=O)NCCNCc1ccc(OCc2cccc(c2C)-c2ccccc2)cc1OCc1cccc(OC(F)(F)F)c1	719230	6.081969663215119
705866	CC(=O)NCCNCc1ccc(OCc2cccc(c2C)-c2ccccc2)cc1OCc1ccc2nc(cc(Cl)c2c1)C(F)(F)F	719231	4.997833938243492
705867	CC(=O)NCCNCc1ccc(OCc2cccc(c2C)-c2ccccc2)cc1OCc1ccc(cc1)S(C)(=O)=O	719232	4.997833938243492
705868	CC(=O)NCCNCc1ccc(OCc2cccc(c2C)-c2ccccc2)cc1OCc1ccccc1OC(F)F	719233	4.997833938243492
705869	COc1cccc(COc2cc(OCc3cccc(c3C)-c3ccccc3)ccc2CNCCNC(C)=O)c1	719234	4.997833938243492
705870	CC(=O)NCCNCc1ccc(OCc2cccc(c2C)-c2ccccc2)cc1OCc1ccccc1OC(F)(F)F	719235	4.997833938243492
705871	CC(=O)NCCNCc1ccc(OCc2cccc(c2C)-c2ccccc2)cc1OCc1ccc(OC(F)F)cc1	719236	4.997833938243492
705872	CC(=O)NCCNCc1ccc(OCc2cccc(c2C)-c2ccccc2)cc1OCc1ccc(cc1)-c1ccccc1C#N	719237	4.997833938243492
705873	COc1ccc(COc2cc(OCc3cccc(c3C)-c3ccccc3)ccc2CNCCNC(C)=O)cc1	719238	4.997833938243492
705874	CC(=O)NCCNCc1ccc(OCc2cccc(c2C)-c2ccccc2)cc1OCc1cc(F)cc(Cl)c1	719239	4.997833938243492
705875	COc1ccc(F)c(COc2cc(OCc3cccc(c3C)-c3ccccc3)ccc2CNCCNC(C)=O)c1F	719240	4.997833938243492
705876	COc1cc(COc2cc(OCc3cccc(c3C)-c3ccccc3)ccc2CNCCNC(C)=O)ccc1F	719241	4.997833938243492
705877	CC(=O)NCCNCc1ccc(OCc2cccc(c2C)-c2ccccc2)cc1OCc1cc(C)ccc1F	719242	4.997833938243492
705878	CC(=O)NCCNCc1ccc(OCc2cccc(c2C)-c2ccccc2)cc1OCc1cc(ccc1F)C#N	719243	7.090443970758825
705879	COc1cc(F)cc(COc2cc(OCc3cccc(c3C)-c3ccccc3)ccc2CNCCNC(C)=O)c1	719244	4.997833938243492
705880	CC(=O)NCCNCc1ccc(OCc2cccc(c2C)-c2ccccc2)cc1OCc1ccc(Br)cc1C#N	719245	4.997833938243492
705881	CC(=O)NCCNCc1ccc(OCc2cccc(c2C)-c2ccccc2)cc1OCc1ccc2[nH]ncc2c1	719246	4.997833938243492
705882	CC(=O)NCCNCc1ccc(OCc2cccc(c2C)-c2ccccc2)cc1OCc1ccc2n(ncc2c1)C1CCCCO1	719247	4.997833938243492
705883	CC(=O)NCCNCc1ccc(OCc2cccc(c2C)-c2ccccc2)cc1OCc1ccncn1	719248	4.997833938243492
705884	COC(=O)Cc1cccc(COc2cc(OCc3cccc(c3C)-c3ccccc3)ccc2CNCCNC(C)=O)c1	719249	4.997833938243492
705885	CC(=O)NCCNCc1ccc(OCc2cccc(c2C)-c2ccccc2)cc1OCc1ccc2cn[nH]c2c1	719250	4.997833938243492
705886	COC(=O)c1ccc(F)c(COc2cc(OCc3cccc(c3C)-c3ccccc3)ccc2CNCCNC(C)=O)c1	719251	4.997833938243492
705887	CC(=O)NCCNCc1ccc(OCc2cccc(-c3ccccc3)c2C)cc1OCc1noc(C)n1	719252	4.997833938243492
705888	CC(=O)NCCNCc1ccc(OCc2cccc(c2C)-c2ccccc2)cc1OCc1cccc(c1)C(=O)OC(C)(C)C	719253	4.997833938243492
705889	CC(=O)NCCNCc1ccc(OCc2cccc(c2C)-c2ccccc2)cc1OCc1cc(F)cc(OC(F)(F)F)c1	719254	4.997833938243492
705890	COc1cc(COc2cc(OCc3cccc(c3C)-c3ccccc3)ccc2CNCCNC(C)=O)cc(OC)c1	719255	4.997833938243492
705891	CC(=O)NCCNCc1ccc(OCc2cccc(c2C)-c2ccccc2)cc1OCc1ccc(F)c(C)c1	719256	6.204815410317575
705892	CC(=O)NCCNCc1ccc(OCc2cccc(c2C)-c2ccccc2)cc1OCc1cc(Cl)ccc1F	719257	4.997833938243492
705893	CC(=O)NCCNCc1ccc(OCc2cccc(c2C)-c2ccccc2)cc1OCc1ccc(F)c(Cl)c1	719258	4.997833938243492
705894	CC(=O)NCCNCc1ccc(OCc2cccc(c2C)-c2ccccc2)cc1OCc1ccncc1	719259	6.259637310505756
705895	CC(=O)NCCNCc1ccc(OCc2cccc(c2C)-c2ccccc2)cc1OCc1cccc(c1)-n1cccc1	719260	4.997833938243492
705896	CC(=O)NCCNCc1ccc(OCc2cccc(c2C)-c2ccccc2)cc1OCc1cc(C)cc(F)c1	719261	4.997833938243492
705897	CC(=O)NCCNCc1ccc(OCc2cccc(c2C)-c2ccccc2)cc1OCc1ccc(F)c(c1)C#N	719262	6.259637310505756
705899	CC(=O)NCCNCc1ccc(OCc2cccc(c2C)-c2ccccc2)cc1OCc1cccc(OC(F)F)c1	719264	4.997833938243492
705900	CC(=O)NCCNCc1ccc(OCc2cccc(c2C)-c2ccccc2)cc1OCc1cccnc1	719265	6.259637310505756
705901	CC(=O)NCCNCc1ccc(OCc2cccc(c2C)-c2ccccc2)cc1OCc1nccc2ccccc12	719266	4.997833938243492
705902	CC(=O)NCCNCc1ccc(OCc2cccc(c2C)-c2ccccc2)cc1OCc1cccc(NC(=O)OC(C)(C)C)c1	719267	4.846185135655471
705903	CC(=O)NCCNCc1ccc(OCc2cccc(c2C)-c2ccccc2)cc1OC[C@@H]1CCC(=O)N1	719268	6.259637310505756
705916	COc1cc(OCc2cccc(c2C)-c2ccccc2)cc(OCc2cccc(c2)C#N)c1CNC[C@@H](O)CC(O)=O	719281	8.275724130399212
705917	COc1cc(OCc2cccc(c2C)-c2ccccc2)cc(OCc2cccc(c2)C#N)c1CN[C@H](CO)C(O)=O	719282	8.275724130399212
705918	COc1cc(OCc2cccc(c2C)-c2ccccc2)cc(OCc2cccc(c2)C#N)c1CN[C@H]([C@H](C)O)C(O)=O	719283	8.275724130399212
705919	COc1cc(OCc2cccc(c2C)-c2ccccc2)cc(OCc2cccc(c2)C#N)c1CN[C@@H]([C@H](C)O)C(O)=O	719284	8.275724130399212
705920	COc1cc(OCc2cccc(c2C)-c2ccccc2)cc(OCc2cccc(c2)C#N)c1CNC(C)(CO)C(O)=O	719285	8.275724130399212
705921	COc1cc(OCc2cccc(c2C)-c2ccccc2)cc(OCc2cccc(c2)C#N)c1CN[C@H]([C@@H](C)O)C(O)=O	719286	6.259637310505756
705926	Cc1c(COc2ccc(CN[C@H](CO)C(O)=O)c(OCCCCC#N)c2)cccc1-c1ccccc1	719291	8.275724130399212
705927	Cc1c(COc2ccc(CNC[C@@H](O)CC(O)=O)c(OCCCCC#N)c2)cccc1-c1ccccc1	719292	8.275724130399212
706013	Cc1c(COc2ccc(CN[C@H](CO)C(O)=O)c(OCc3cccc(c3)C#N)c2Cl)cccc1-c1ccccc1	719378	4.997833938243492
706014	Cc1c(COc2ccc(CNC[C@@H](O)CC(O)=O)c(OCc3cccc(c3)C#N)c2Cl)cccc1-c1ccccc1	719379	4.997833938243492
706015	Cc1c(COc2ccc(CN3CCCC[C@H]3C(O)=O)c(OCc3cccc(c3)C#N)c2Cl)cccc1-c1ccccc1	719380	4.997833938243492
706016	CC(=O)NCCNCc1ccc(OCc2cccc(c2C)-c2ccccc2)c(Cl)c1OCc1cccc(c1)C#N	719381	4.997833938243492
706080	Cc1c(COc2cc(OCc3cncc(c3)C#N)c(CN3CCCC[C@H]3C(O)=O)cc2Br)cccc1-c1ccccc1	719445	8.275724130399212
706106	Cc1c(COc2cc(OCc3cccc(c3C)-c3ccccc3)ccc2CN[C@H](CO)C(O)=O)cncc1C#N	719471	6.259637310505756
706109	Cc1c(COc2ccc(CN[C@H](CO)C(O)=O)c(OCc3cncc(c3)C#N)c2)cccc1-c1ccccc1	719474	8.275724130399212
706110	Cc1c(COc2ccc(CNC[C@@H](O)CC(O)=O)c(OCc3cncc(c3)C#N)c2)cccc1-c1ccccc1	719475	8.275724130399212
706111	Cc1c(COc2ccc(CN3CCCC[C@H]3C(O)=O)c(OCc3cncc(c3)C#N)c2)cccc1-c1ccccc1	719476	8.275724130399212
706112	Cc1c(COc2ccc(CNC[C@@H](O)CC(O)=O)c(OCc3ccc(F)c(c3)C#N)c2)cccc1-c1ccccc1	719477	8.275724130399212
706113	Cc1c(COc2ccc(CN[C@H](CO)C(O)=O)c(OCc3ccc(F)c(c3)C#N)c2)cccc1-c1ccccc1	719478	8.275724130399212
706114	Cc1c(COc2ccc(CN[C@](C)(CO)C(O)=O)c(OCc3ccc(F)c(c3)C#N)c2)cccc1-c1ccccc1	719479	8.275724130399212
706115	Cc1c(COc2ccc(CN3CCCC[C@H]3C(O)=O)c(OCc3ccc(F)c(c3)C#N)c2)cccc1-c1ccccc1	719480	8.275724130399212
706116	COc1cc(OCc2cccc(c2C)-c2ccccc2)ccc1CNCCNC(C)=O	719481	4.997833938243492
709468	COc1cc(OCc2cccc(c2C)-c2ccccc2)cc(OC)c1CC1CCCC[C@H]1C(O)=O	723056	7.275724130399211
709469	Cc1c(COc2ccc3CN(CC(O)=O)CCc3c2)cccc1-c1ccccc1	723057	6.255707016877323
709470	Cc1c(COc2ccc(CNCCO)cc2Cl)cccc1-c1ccccc1	723058	7.275724130399211
709471	COc1cccc(c1)-c1cccc(COc2ccc(CN3CCC3)cc2)c1C	723059	5.259242676692229
709472	COc1cc(OCc2cccc(c2C)-c2ccccc2)c(Br)c(OC)c1CNCCNC(C)=O	723060	6.255707016877323
709473	COc1cc(OCc2cccc(c2C)-c2ccccc2)cc(OC)c1CNC(C)(C)CN1CCN(C)CC1	723061	7.275724130399211
709474	COc1cc(OCc2cccc(c2C)-c2ccccc2)cc(OC)c1CNCCN(C)S(C)(=O)=O	723062	6.255707016877323
709475	Cc1c(COc2ccc(CN3CCCCC3C(O)=O)cc2Br)cccc1-c1ccccc1	723063	6.835647144215562
709476	COc1cc(OCc2cccc(c2C)-c2ccccc2)cc(OC)c1CNCC(=O)N1CCOCC1	723064	6.255707016877323
709477	COc1cc(OCc2cccc(c2C)-c2ccccc2)cc(OC)c1CNCCN1CCN(C)CC1	723065	6.255707016877323
709478	COc1cc(OCc2cccc(c2C)-c2ccccc2)cc(OC)c1CNCCN1CCCCC1=O	723066	6.255707016877323
709479	COc1cc(OCc2cccc(c2C)-c2ccccc2)cc(OC)c1CNCCCN1CCCC1=O	723067	6.255707016877323
709480	COc1cc(OCc2cccc(c2C)-c2ccccc2)cc(OC)c1CNCCN1CCNC(=O)C1	723068	6.255707016877323
709481	COc1cc(OCc2cccc(c2C)-c2ccccc2)cc(OC)c1CNCCN1CCOCC1	723069	6.255707016877323
709482	COc1cc(OCc2cccc(c2C)-c2ccccc2)cc(OC)c1CN1CCCCC1C(O)=O	723070	6.255707016877323
709483	CN(CC(O)=O)Cc1cccc(OCc2cccc(c2C)-c2ccccc2)c1	723071	5.711080394338273
709484	CCN1CCCC(C1)NCc1c(OC)cc(OCc2cccc(c2C)-c2ccccc2)cc1OC	723072	6.255707016877323
709485	COc1cc(OCc2cccc(c2C)-c2ccccc2)cc(OC)c1CNCCN1CCCC1=O	723073	6.255707016877323
709486	CC(=O)O[C@@H]1C[C@H](N(Cc2ccc(OCc3cccc(c3C)-c3ccccc3)c(C)c2)C1)C(O)=O	723074	6.255707016877323
709487	COc1cc(OCc2cccc(c2C)-c2ccccc2)ccc1CN1CCC(CC1)C(=O)NCCO	723075	6.255707016877323
709488	COc1cc(OCc2cccc(-c3ccccc3)c2C)cc(OC)c1CNC(C)c1nnc(C)[nH]1	723076	6.255707016877323
709489	CC(=O)NCCNCc1ccc(OCc2cccc(c2C)-c2ccccc2)c(Br)c1	723077	6.255707016877323
709490	CO[C@@H]1C[C@H](N(Cc2ccc(OCc3cccc(c3C)-c3ccccc3)c(Cl)c2)C1)C(O)=O	723078	6.255707016877323
709491	COc1cc(OCc2cccc(c2C)-c2ccccc2)cc(OC)c1CNCCCNC(C)=O	723079	6.255707016877323
709492	COc1cc(OCc2cccc(c2C)-c2ccccc2)cc(OC)c1CN[C@@H]1CCCC[C@H]1O	723080	6.255707016877323
709493	COc1cc(OCc2cccc(c2C)-c2ccccc2)cc(OC)c1CNC1CCCN(C)C1	723081	6.255707016877323
709494	COc1c(CN2CCCC[C@H]2C(O)=O)ccc(OCc2cccc(c2C)-c2ccccc2)c1C	723082	6.255707016877323
709495	Cc1cc(CN2CCC[C@]2(CC=C)C(O)=O)ccc1OCc1cccc(c1C)-c1ccccc1	723083	6.255707016877323
709496	Cc1c(COc2ccc(CNCCC(N)=O)cc2Br)cccc1-c1ccccc1	723084	6.255707016877323
709497	Cc1c(COc2cccc(CNCCC(N)=O)c2)cccc1-c1ccccc1	723085	5.259242676692229
709498	Cc1c(COc2ccc(CN3CCOCC3C(O)=O)cc2Cl)cccc1-c1ccccc1	723086	6.255707016877323
709499	COc1cc(OCc2cccc(c2C)-c2ccccc2)cc(OC)c1CNC(C)CC(O)=O	723087	6.255707016877323
709500	Cc1c(COc2ccc(CN3CCC(CC3)C(O)=O)cc2Cl)cccc1-c1ccccc1	723088	6.255707016877323
709501	Cc1c(COc2ccc(CN3CCCC[C@@H]3C(O)=O)cc2Cl)cccc1-c1ccccc1	723089	6.255707016877323
709502	Cc1c(COc2ccc(CN3CCCC[C@H]3C(O)=O)cc2Cl)cccc1-c1ccccc1	723090	7.275724130399211
709503	COc1cc(OCc2cccc(c2C)-c2ccccc2)cc(OC)c1CNCC(=O)N(C)C	723091	6.255707016877323
709504	COc1cc(OCc2cccc(c2C)-c2ccccc2)cc(OC)c1CNCCNC(C)=O	723092	7.275724130399211
709505	COc1cc(OCc2cccc(c2C)-c2ccccc2)ccc1CN1CCCCC1C(O)=O	723093	6.255707016877323
709506	Cc1c(COc2cccc(CN3CCC3)c2)cccc1-c1ccccc1	723094	5.378408324140781
709507	CO[C@@H]1C[C@H](N(Cc2ccc(OCc3cccc(c3C)-c3ccccc3)c(C)c2)C1)C(O)=O	723095	7.275724130399211
709508	Cc1cc(OCc2cccc(c2C)-c2ccccc2)cc(C)c1CN1CCCCC1C(O)=O	723096	6.255707016877323
709509	Cc1cc(CN2CCCCCC2C(O)=O)ccc1OCc1cccc(c1C)-c1ccccc1	723097	6.255707016877323
709510	Cc1cc(CN2CCCCC2CC(O)=O)ccc1OCc1cccc(c1C)-c1ccccc1	723098	6.255707016877323
709511	Cc1cc(CNCCCN2CCCC2=O)ccc1OCc1cccc(c1C)-c1ccccc1	723099	6.255707016877323
709512	CC(NCCNC(C)=O)c1ccc(OCc2cccc(c2C)-c2ccccc2)c(Cl)c1	723100	6.255707016877323
709513	COc1cc(OCc2cccc(c2C)-c2ccccc2)cc(OC)c1CN(C)CC(O)=O	723101	6.255707016877323
709514	COc1cc(OCc2cccc(c2C)-c2ccccc2)cc(OC)c1CNCCC(N)=O	723102	6.255707016877323
709515	COc1cc(OCc2cccc(c2C)-c2ccccc2)cc(OC)c1CN[C@@H](C)C(O)=O	723103	6.255707016877323
709516	Cc1c(COc2cccc(CN3CCCCC3C(O)=O)c2)cccc1-c1ccccc1	723104	5.022642270454698
709517	Cc1c(COc2ccc(CN3CCCCC3C(O)=O)cc2F)cccc1-c1ccccc1	723105	6.255707016877323
709518	Cc1cc(CN2C[C@H](O)C[C@@H]2C(O)=O)ccc1OCc1cccc(c1C)-c1ccccc1	723106	6.255707016877323
709519	Cc1cc(CN2C[C@@H](O)C[C@@H]2C(O)=O)ccc1OCc1cccc(c1C)-c1ccccc1	723107	6.255707016877323
709520	Cc1cc(CN2CCCCC2C(O)=O)ccc1OCc1cccc(c1C)-c1ccccc1	723108	7.275724130399211
709521	Cc1cc(CN2CCCC(C2)C(O)=O)ccc1OCc1cccc(c1C)-c1ccccc1	723109	6.255707016877323
709522	Cc1cc(CN2CCC[C@H](C2)C(O)=O)ccc1OCc1cccc(c1C)-c1ccccc1	723110	6.255707016877323
709523	C[C@@H]1C[C@@H](N(Cc2ccc(OCc3cccc(c3C)-c3ccccc3)c(C)c2)C1)C(O)=O	723111	6.255707016877323
709524	Cc1cc(CN2CCCC[C@H]2C(O)=O)ccc1OCc1cccc(c1C)-c1ccccc1	723112	7.275724130399211
709525	Cc1cc(CN2CCC(CC2)C(O)=O)ccc1OCc1cccc(c1C)-c1ccccc1	723113	6.255707016877323
709526	Cc1cc(CN2CCCC[C@@H]2C(O)=O)ccc1OCc1cccc(c1C)-c1ccccc1	723114	6.255707016877323
709527	Cc1ccc(CN2CCCC[C@H]2C(O)=O)cc1OCc1cccc(c1C)-c1ccccc1	723115	6.255707016877323
709528	Cc1c(COc2cccc(CNCCCN3CCCC3=O)c2)cccc1-c1ccccc1	723116	5.259242676692229
709530	CC(=O)NCCNC1CCCc2cc(OCc3cccc(c3C)-c3ccccc3)ccc12	723118	5.259242676692229
709531	Cc1cc(CN2CCC=C(C2)C(O)=O)ccc1OCc1cccc(c1C)-c1ccccc1	723119	5.259242676692229
709532	Cc1c(COc2ccc(CNC(C)(C)C(O)=O)cc2Cl)cccc1-c1ccccc1	723120	7.275724130399211
709533	CC(=O)NCCNCc1ccc(OCc2cccc(c2C)-c2ccccc2)c(Cl)c1	723121	6.255707016877323
709534	Cc1c(COc2ccc(CN3CCC3)cc2Br)cccc1-c1ccccc1	723122	6.255707016877323
709536	COc1cc(OCc2cccc(c2C)-c2ccccc2)cc(OC)c1CNC1CCC1	723124	6.255707016877323
709537	CC(=O)NCCNCc1c(C)cc(OCc2cccc(c2C)-c2ccccc2)cc1C	723125	6.255707016877323
709538	CC(NCCNC(C)=O)c1ccc(OCc2cccc(c2C)-c2ccccc2)c(C)c1	723126	6.255707016877323
709539	Cc1cc(CN2CCC[C@H]2C(O)=O)ccc1OCc1cccc(c1C)-c1ccccc1	723127	6.255707016877323
709540	Cc1cc(CN2CCCC2C(O)=O)ccc1OCc1cccc(c1C)-c1ccccc1	723128	6.255707016877323
709541	Cc1cc(CN[C@@H]2CCCC[C@H]2O)ccc1OCc1cccc(c1C)-c1ccccc1	723129	6.255707016877323
709542	Cc1c(COc2ccc(CN3CCCCC3C(O)=O)cc2)cccc1-c1ccccc1	723130	6.020907099361673
709543	Cc1cc(CN2CCC[C@@H]2C(O)=O)ccc1OCc1cccc(c1C)-c1ccccc1	723131	6.255707016877323
709544	Cc1cc(CNCC2CCC(=O)N2)ccc1OCc1cccc(c1C)-c1ccccc1	723132	6.255707016877323
709545	C[C@H](NCc1ccc(OCc2cccc(c2C)-c2ccccc2)c(Cl)c1)C(O)=O	723133	7.275724130399211
709546	C[C@@H](NCc1ccc(OCc2cccc(c2C)-c2ccccc2)c(Cl)c1)C(O)=O	723134	7.275724130399211
709547	CC(=O)NCCNCc1ccc(OCc2cccc(c2C)-c2ccccc2)c(F)c1	723135	5.259242676692229
709548	COc1cc(OCc2cccc(c2C)-c2ccccc2)ccc1CN[C@@H](C)C(O)=O	723136	6.255707016877323
709549	C[C@H](NCc1cccc(OCc2cccc(c2C)-c2ccccc2)c1)C(O)=O	723137	5.496754228534886
709550	COc1cc(OCc2cccc(c2C)-c2ccccc2)ccc1CNCCC(N)=O	723138	6.255707016877323
709551	CCc1cc(OCc2cccc(c2C)-c2ccccc2)cc(OC)c1CN1CCC1	723139	5.259242676692229
709552	CC(CC(O)=O)NCc1ccc(OCc2cccc(c2C)-c2ccccc2)c(C)c1	723140	6.255707016877323
709553	C[C@@H](N(C)Cc1ccc(OCc2cccc(c2C)-c2ccccc2)c(C)c1)C(O)=O	723141	6.255707016877323
709554	Cc1cc(OCc2cccc(c2C)-c2ccccc2)cc(C)c1CNCCC(N)=O	723142	6.255707016877323
709555	CC(=O)CCNCc1ccc(OCc2cccc(c2C)-c2ccccc2)c(C)c1	723143	6.255707016877323
709556	CC(=O)NCCNCc1ccc(C)c(OCc2cccc(c2C)-c2ccccc2)c1	723144	6.255707016877323
709557	Cc1cc(CN2CCC[C@H]2CO)ccc1OCc1cccc(c1C)-c1ccccc1	723145	6.255707016877323
709558	Cc1cc(CN2CC[C@H]2C(O)=O)ccc1OCc1cccc(c1C)-c1ccccc1	723146	6.255707016877323
709559	Cc1c(COc2ccc(CNCC3CCC(=O)N3)cc2)cccc1-c1ccccc1	723147	5.259242676692229
709560	Cc1c(COc2ccc(CNC[C@H]3CCC(=O)N3)cc2)cccc1-c1ccccc1	723148	6.255707016877323
709561	C[C@H](NCc1ccc(OCc2cccc(c2C)-c2ccccc2)c(C)c1)C(O)=O	723149	6.255707016877323
709562	CN(CC(O)=O)Cc1ccc(OCc2cccc(c2C)-c2ccccc2)c(C)c1	723150	6.255707016877323
709563	Cc1cc(CNCCC(N)=O)ccc1OCc1cccc(c1C)-c1ccccc1	723151	6.255707016877323
709564	C[C@@H](NCc1ccc(OCc2cccc(c2C)-c2ccccc2)c(C)c1)C(O)=O	723152	6.255707016877323
709565	Cc1c(COc2ccc(CN3CCC3)cc2Cl)cccc1-c1ccccc1	723153	6.255707016877323
709566	COc1cc(OCc2cccc(c2C)-c2ccccc2)ccc1CN1CCC1	723154	6.255707016877323
709567	Cc1cc(CN2CCC2)ccc1OCc1cccc(c1C)-c1ccccc1	723155	6.255707016877323
709568	Cc1c(COc2ccc3CNCCc3c2)cccc1-c1ccccc1	723156	5.968187728669629
709569	Cc1cc(CNCCO)ccc1OCc1cccc(c1C)-c1ccccc1	723157	7.275724130399211
709570	COc1cc(OCc2cccc(c2C)-c2ccccc2)cc(OC)c1CNCCO	723158	7.275724130399211
709571	C[C@H](NCc1ccc(OCc2cccc(c2C)-c2ccccc2)c(Br)c1)C(O)=O	723159	6.255707016877323
709572	COc1cc(OCc2cccc(c2C)-c2ccccc2)cc(OC)c1CN[C@H](C)C(O)=O	723160	7.275724130399211
709573	COc1cccc(c1)-c1cccc(COc2cc(OC)c(CN[C@H](C)C(O)=O)c(OC)c2)c1C	723161	6.255707016877323
709574	COc1cc(F)cc(c1)-c1cccc(COc2cc(OC)c(CN[C@H](C)C(O)=O)c(OC)c2)c1C	723162	6.482804102050025
709576	CC(=O)NCCNC1CCc2c1cccc2OCc1cccc(c1C)-c1ccccc1	723164	6.255707016877323
709577	Cc1cc(CNCC2CC(=O)N2)ccc1OCc1cccc(c1C)-c1ccccc1	723165	7.275724130399211
709578	COc1cc(OCc2cccc(c2C)-c2ccccc2)cc(OC)c1CNC[C@@H](O)CC(O)=O	723166	7.275724130399211
709582	C[C@H](O)[C@@H](NCc1ccc(OCc2cccc(c2C)-c2ccccc2)c(Cl)c1)C(O)=O	723170	7.275724130399211
709583	C[C@@H](O)[C@@H](NCc1ccc(OCc2cccc(c2C)-c2ccccc2)c(Cl)c1)C(O)=O	723171	7.275724130399211
709584	C[C@H](O)[C@H](NCc1ccc(OCc2cccc(c2C)-c2ccccc2)c(Cl)c1)C(O)=O	723172	6.255707016877323
709590	COc1cc(OCc2cccc(-c3ccccc3)c2C#N)cc(OC)c1CNCc1ccccn1	723178	7.275724130399211
709591	COc1cc(OCc2cccc(-c3ccccc3)c2C#N)cc(OC)c1CNC1CC1	723179	7.275724130399211
709592	COc1cc(OCc2cccc(-c3ccccc3)c2C#N)cc(OC)c1CN1CCCC(C)C1	723180	7.275724130399211
709593	COc1cc(OCc2cccc(-c3ccccc3)c2C#N)cc(OC)c1CNCCN1CCCC1	723181	6.255707016877323
709594	COc1cc(OCc2cccc(c2C)-c2ccccc2)cc(OC)c1CNCCN1CCC(O)CC1	723182	7.275724130399211
709595	COc1cc(OCc2cccc(-c3ccccc3)c2C#N)cc(OC)c1CNCCN1CCOCC1	723183	7.275724130399211
709596	COc1cc(OCc2cccc(-c3ccccc3)c2C#N)cc(OC)c1CNCc1cccnc1	723184	6.255707016877323
709597	COc1cc(OCc2cccc(-c3ccccc3)c2C#N)cc(OC)c1CNCc1ccncc1	723185	6.255707016877323
709598	COc1cc(OCc2cccc(-c3ccccc3)c2C#N)cc(OC)c1CNCc1cccc(O)c1	723186	6.255707016877323
709599	COc1cc(OCc2cccc(-c3ccccc3)c2C#N)cc(OC)c1CNCc1ccccc1O	723187	6.255707016877323
709600	COc1cc(OCc2cccc(-c3ccccc3)c2C#N)cc(OC)c1CNCc1ccc(O)cc1	723188	6.255707016877323
709601	COc1cc(OCc2cccc(-c3ccccc3)c2C#N)cc(OC)c1CNC1CCC1	723189	7.275724130399211
709602	COc1cc(OCc2cccc(-c3ccccc3)c2C#N)cc(OC)c1CNC1CCCC1	723190	7.275724130399211
709603	COc1cc(OCc2cccc(-c3ccccc3)c2C#N)cc(OC)c1CNC1CCCCC1	723191	7.275724130399211
709604	COc1cc(OCc2cccc(-c3ccccc3)c2C#N)cc(OC)c1CNCCCN1CCCC1=O	723192	7.275724130399211
709605	COc1cc(OCc2cccc(-c3ccccc3)c2C#N)cc(OC)c1CNC(C)C	723193	7.275724130399211
709606	COc1cc(OCc2cccc(-c3ccccc3)c2C#N)cc(OC)c1CNCCNC(C)=O	723194	7.275724130399211
709607	COc1cc(OCc2cccc(-c3ccccc3)c2C#N)cc(OC)c1CNCCN(C)C	723195	7.275724130399211
709608	COCCNCc1c(OC)cc(OCc2cccc(-c3ccccc3)c2C#N)cc1OC	723196	7.275724130399211
709609	COc1cc(OCc2cccc(-c3ccccc3)c2C#N)cc(OC)c1CNCCO	723197	7.275724130399211
709610	COc1cc(OCc2cccc(-c3ccccc3)c2C#N)cc(OC)c1CNC1(CO)CCCC1	723198	7.275724130399211
709611	COc1cc(OCc2cccc(-c3ccccc3)c2C#N)cc(OC)c1CNC1CCC(O)CC1	723199	7.275724130399211
709612	COc1cc(OCc2cccc(-c3ccccc3)c2C#N)cc(OC)c1CNCCC(N)=O	723200	7.275724130399211
709613	CNCc1c(OC)cc(OCc2cccc(-c3ccccc3)c2C#N)cc1OC	723201	7.275724130399211
709614	COc1cc(OCc2cccc(-c3ccccc3)c2C#N)cc(OC)c1CNCCc1ccccn1	723202	7.275724130399211
709615	COc1cc(OCc2cccc(-c3ccccc3)c2C#N)cc(OC)c1CN1CCCC1C	723203	7.275724130399211
709616	COc1cc(OCc2cccc(-c3ccccc3)c2C#N)cc(OC)c1CN1CCN(CC1)C(C)=O	723204	7.275724130399211
709617	COc1cc(OCc2cccc(-c3ccccc3)c2C#N)cc(OC)c1CN1CCCC1	723205	7.275724130399211
709618	COc1cc(OCc2cccc(-c3ccccc3)c2C#N)cc(OC)c1CN1CCCC(CO)C1	723206	7.275724130399211
709619	COc1cc(OCc2cccc(-c3ccccc3)c2C#N)cc(OC)c1CN1CC[C@@H](C1)NC(C)=O	723207	7.275724130399211
709620	COc1cc(OCc2cccc(-c3ccccc3)c2C#N)cc(OC)c1CN1CCC1	723208	7.275724130399211
709621	COc1cc(OCc2cccc(-c3ccccc3)c2C#N)cc(OC)c1CN1CCCN(CC1)C(C)=O	723209	7.275724130399211
709622	CCN(Cc1ccncc1)Cc1c(OC)cc(OCc2cccc(-c3ccccc3)c2C#N)cc1OC	723210	6.255707016877323
709623	COc1cc(OCc2cccc(-c3ccccc3)c2C#N)cc(OC)c1CN1CCC[C@H]1CO	723211	7.275724130399211
709624	COc1cc(OCc2cccc(-c3ccccc3)c2C#N)cc(OC)c1CN1C(C)CCC1C	723212	6.255707016877323
709625	COc1cc(OCc2cccc(-c3ccccc3)c2C#N)cc(OC)c1CN1CCCC(O)C1	723213	7.275724130399211
709626	COc1cc(OCc2cccc(-c3ccccc3)c2C#N)cc(OC)c1CN1CCCC(C1)C(O)=O	723214	6.255707016877323
709627	COc1cc(OCc2cccc(-c3ccccc3)c2C#N)cc(OC)c1CN1CCC[C@H]1C(N)=O	723215	6.255707016877323
709628	COc1cc(OCc2cccc(-c3ccccc3)c2C#N)cc(OC)c1CN1CCCC[C@@H]1C(O)=O	723216	7.275724130399211
709629	Cc1c(COc2ccc(CN3CC4(C[C@H]3C(O)=O)N=N4)cc2Cl)cccc1-c1ccccc1	723217	6.255707016877323
709630	COc1cc(OCc2cccc(c2C)-c2ccccc2)cc(OC)c1CNCCOCCOCCN	723218	7.031517051446063
709631	COc1cc(OCc2cccc(c2C)-c2ccccc2)cc(OC)c1CNCCOCCOCCO	723219	7.275724130399211
709632	COc1cc(OCc2cccc(c2C)-c2ccccc2)cc(OC)c1CNCCN1CCN(CC1)c1ccccc1OC	723220	6.255707016877323
709633	COc1cc(OCc2cccc(c2C)-c2ccccc2)cc(OC)c1CNCCN1CCN(CC1)c1ccccn1	723221	6.255707016877323
709634	COc1cc(OCc2cccc(c2C)-c2ccccc2)cc(OC)c1CNCCN1CCN(CC1)c1ncccn1	723222	6.255707016877323
709635	COc1cc(OCc2cccc(c2C)-c2ccccc2)cc(OC)c1CNCCN1CCN(CC1)C(=O)OC(C)(C)C	723223	6.255707016877323
709636	COc1cc(OCc2cccc(c2C)-c2ccccc2)cc(OC)c1CNCCN1CCS(=O)(=O)CC1	723224	6.255707016877323
709637	COc1cc(OCc2cccc(c2C)-c2ccccc2)cc(OC)c1CNCCNC(=O)OCc1ccccc1	723225	6.255707016877323
709638	COc1cc(OCc2cccc(c2C)-c2ccccc2)cc(OC)c1CNCCCN1CCN(C)CC1	723226	6.255707016877323
709639	COc1cc(OCc2cccc(c2C)-c2ccccc2)cc(OC)c1CNCCCN1CCOCC1	723227	6.970616222314789
709640	COc1cc(OCc2cccc(c2C)-c2ccccc2)cc(OC)c1CNCCCn1ccnc1	723228	7.275724130399211
709641	COc1cc(OCc2cccc(c2C)-c2ccccc2)cc(OC)c1CNCC1CC(=O)N1	723229	7.6575773191777925
709642	COc1cc(OCc2cccc(c2C)-c2ccccc2)cc(OC)c1CNCCC(=O)NCCc1c[nH]cn1	723230	6.255707016877323
709643	COc1cc(OCc2cccc(c2C)-c2ccccc2)cc(OC)c1CNCCCN(CCO)CCO	723231	6.255707016877323
709644	COc1cc(OCc2cccc(c2C)-c2ccccc2)cc(OC)c1CNCCCOc1ccccc1	723232	6.255707016877323
709645	COc1cc(OCc2cccc(c2C)-c2ccccc2)cc(OC)c1CNCCC(O)C(O)=O	723233	7.275724130399211
709646	COc1cc(OCc2cccc(c2C)-c2ccccc2)cc(OC)c1CNCCCN1CCN(CC1)c1cccc(O)c1	723234	6.255707016877323
709647	COc1cc(OCc2cccc(c2C)-c2ccccc2)cc(OC)c1CNCCOCc1ccccc1	723235	6.255707016877323
709648	COc1cc(OCc2cccc(c2C)-c2ccccc2)cc(OC)c1CNCCOCCOCCOCCO	723236	7.275724130399211
709649	COc1cc(OCc2cccc(c2C)-c2ccccc2)cc(OC)c1CNCCOCCOCCOCCOCCOCCOCCC(O)=O	723237	6.255707016877323
709650	COc1cc(OCc2cccc(c2C)-c2ccccc2)cc(OC)c1CNCCOCCOCCOCCOCCC(O)=O	723238	6.255707016877323
709651	COc1cc(OCc2cccc(c2C)-c2ccccc2)cc(OC)c1CNCC(=O)C[C@H](Cc1ccccc1)C(=O)N[C@@H](CCCNC(N)=N)C(O)=O	723239	6.255707016877323
709652	COc1cc(OCc2cccc(c2C)-c2ccccc2)cc(OC)c1CNCC(=O)NCC(=O)NCC(O)=O	723240	7.275724130399211
709653	COc1cc(OCc2cccc(c2C)-c2ccccc2)cc(OC)c1CNCCCC[C@H](NC(C)=O)C(O)=O	723241	7.275724130399211
709654	COc1cc(OCc2cccc(c2C)-c2ccccc2)cc(OC)c1CNCC1CC(F)(F)C1	723242	6.255707016877323
709655	COc1cc(OCc2cccc(c2C)-c2ccccc2)cc(OC)c1CNCC1CCC1	723243	6.255707016877323
709656	COc1cc(OCc2cccc(c2C)-c2ccccc2)cc(OC)c1CNCC(=O)NCC(=O)NC(CC(C)C)C(O)=O	723244	6.255707016877323
709657	COc1cc(OCc2cccc(c2C)-c2ccccc2)cc(OC)c1CN(C)CCN	723245	6.255707016877323
709658	COc1cc(OCc2cccc(c2C)-c2ccccc2)cc(OC)c1CN(C)CCNC(=O)c1ccccc1	723246	6.255707016877323
709659	COc1cc(OCc2cccc(c2C)-c2ccccc2)cc(OC)c1CN(C)CCNS(=O)(=O)c1ccc2OC(=O)CCc2c1	723247	6.255707016877323
709660	COc1cc(OCc2cccc(c2C)-c2ccccc2)cc(OC)c1CN(C)CCNC(=O)C=C	723248	6.255707016877323
709661	CCOC(=O)\C=C\C(=O)NCCN(C)Cc1c(OC)cc(OCc2cccc(c2C)-c2ccccc2)cc1OC	723249	6.255707016877323
709662	COc1cc(OCc2cccc(c2C)-c2ccccc2)cc(OC)c1CN1CC2(C[C@H]1C(O)=O)N=N2	723250	6.255707016877323
709663	COc1cc(OCc2cccc(c2C)-c2ccccc2)cc(OC)c1CNC(CO)(CO)CO	723251	7.275724130399211
709664	Cc1c(COc2ccc(CNC[C@@H](O)CC(O)=O)cc2Cl)cccc1-c1ccccc1	723252	7.275724130399211
709665	CC(=O)NCCNCc1ccc(OCc2cccc(c2C)-c2ccccc2)c(c1)C#N	723253	7.275724130399211
709673	Cc1c(COc2ccc(CNCCCN3CCCC3=O)cc2)cccc1-c1ccccc1	723261	6.255707016877323
709696	COc1cc(OCc2cccc(c2C)-c2cccc(O)c2)cc(OC)c1CNCCO	723284	6.255707016877323
709698	CCOc1cccc(c1)-c1cccc(COc2cc(OC)c(CNCCO)c(OC)c2)c1C	723286	6.255707016877323
709699	COc1cc(OCc2cccc(c2C)-c2cccc(OCCN3CCOCC3)c2)cc(OC)c1CNCCO	723287	6.255707016877323
709700	COc1cc(OCc2cccc(c2C)-c2ccccc2)cc(OC)c1CNC(C)(CO)CO	723288	7.275724130399211
709701	CC[C@H](C)[C@@H](CO)NCc1c(OC)cc(OCc2cccc(c2C)-c2ccccc2)cc1OC	723289	7.275724130399211
709702	COc1cc(OCc2cccc(c2C)-c2ccccc2)cc(OC)c1CN[C@@H](CO)CC(C)C	723290	6.255707016877323
709703	COc1cc(OCc2cccc(c2C)-c2ccccc2)cc(OC)c1CNCC(C)O	723291	7.275724130399211
709704	COc1cc(OCc2cccc(c2C)-c2ccccc2)cc(OC)c1CNC1(CO)CCCC1	723292	7.275724130399211
709705	COc1cc(OCc2cccc(c2C)-c2ccccc2)cc(OC)c1CNC(CO)CO	723293	7.275724130399211
709706	CCC(O)CNCc1c(OC)cc(OCc2cccc(c2C)-c2ccccc2)cc1OC	723294	7.275724130399211
709707	COc1cc(OCc2cccc(c2C)-c2ccccc2)cc(OC)c1CN[C@H](CO)CC(C)C	723295	7.275724130399211
709708	COc1cc(OCc2cccc(c2C)-c2ccccc2)cc(OC)c1CN[C@@H](CO)C(C)C	723296	7.275724130399211
709709	COc1cc(OCc2cccc(c2C)-c2ccccc2)cc(OC)c1CN[C@H](CO)C(C)C	723297	7.275724130399211
709710	COc1cc(OCc2cccc(c2C)-c2ccccc2)cc(OC)c1CN[C@H](C)CO	723298	7.275724130399211
709711	CC[C@@H](CO)NCc1c(OC)cc(OCc2cccc(c2C)-c2ccccc2)cc1OC	723299	7.275724130399211
709712	CCCOc1cccc(c1)-c1cccc(COc2cc(OC)c(CNCCO)c(OC)c2)c1C	723300	6.255707016877323
709713	COc1cc(OCc2cccc(c2C)-c2ccccc2)cc(OC)c1CNC[C@H](O)CO	723301	7.275724130399211
709714	CC[C@@](C)(NCc1c(OC)cc(OCc2cccc(c2C)-c2ccccc2)cc1OC)C(O)=O	723302	7.275724130399211
709715	COc1cc(OCc2cccc(c2C)-c2ccccc2)cc(OC)c1CNCC(C)(C)O	723303	7.275724130399211
709716	CCC[C@@H](CO)NCc1c(OC)cc(OCc2cccc(c2C)-c2ccccc2)cc1OC	723304	7.275724130399211
709717	COc1cc(OCc2cccc(c2C)-c2ccccc2)cc(OC)c1CNC(C)C(C)O	723305	7.275724130399211
709718	COc1cc(OCc2cccc(c2C)-c2ccccc2)cc(OC)c1CNC[C@@H](O)CO	723306	7.275724130399211
709719	CC[C@H](CO)NCc1c(OC)cc(OCc2cccc(c2C)-c2ccccc2)cc1OC	723307	7.275724130399211
709720	COc1cc(OCc2cccc(c2C)-c2ccccc2)cc(OC)c1CNC[C@H](C)O	723308	7.275724130399211
709721	COc1cc(OCc2cccc(c2C)-c2ccccc2)cc(OC)c1CNC1CCCCC1O	723309	7.275724130399211
709722	COc1cc(OCc2cccc(c2C)-c2ccccc2)cc(OC)c1CN[C@@H]1CCCC[C@@H]1O	723310	7.275724130399211
709723	COc1cc(OCc2cccc(c2C)-c2ccccc2)cc(OC)c1CN[C@H]1COC[C@@H]1O	723311	7.275724130399211
709724	COc1cc(OCc2cccc(c2C)-c2ccccc2)cc(OC)c1CNCC(O)C(C)C	723312	7.275724130399211
709725	COc1cc(OCc2cccc(c2C)-c2ccccc2)cc(OC)c1CNCC(O)CN(C)C	723313	7.275724130399211
709726	COc1cc(OCc2cccc(c2C)-c2ccccc2)cc(OC)c1CN[C@@H](CO)C1CC1	723314	7.275724130399211
709727	COc1cc(OCc2cccc(c2C)-c2ccccc2)cc(OC)c1CNC(C)C(C)(C)O	723315	6.255707016877323
709728	COc1cc(OCc2cccc(c2C)-c2ccccc2)cc(OC)c1CN[C@@H](CO)c1ccccc1	723316	6.255707016877323
709729	COc1cc(OCc2cccc(c2C)-c2ccccc2)cc(OC)c1CNC1C(O)Cc2ccccc12	723317	6.255707016877323
709730	COc1cc(OCc2cccc(c2C)-c2ccccc2)cc(OC)c1CNC[C@@H](O)c1ccccc1	723318	6.255707016877323
709732	COc1cc(OCc2cccc(c2C)-c2ccccc2)cc(OC)c1CNC1CSCC1C	723320	7.275724130399211
709733	COc1cc(OCc2cccc(c2C)-c2ccccc2)cc(OC)c1CNC[C@H](O)c1ccccc1	723321	6.255707016877323
709734	COc1cc(OCc2cccc(c2C)-c2ccccc2)cc(OC)c1CNCC(O)c1cccnc1	723322	7.275724130399211
709735	COc1cc(OCc2cccc(c2C)-c2ccccc2)cc(OC)c1CNCC(O)c1ccncc1	723323	7.275724130399211
709736	COc1cc(OCc2cccc(c2C)-c2ccccc2)cc(OC)c1CN[C@H](CO)C1CCCCC1	723324	7.275724130399211
709737	COc1cc(OCc2cccc(c2C)-c2ccccc2)cc(OC)c1CNC1(CO)CCOCC1	723325	7.275724130399211
709738	COc1cc(OCc2cccc(c2C)-c2ccccc2)cc(OC)c1CNCC(O)c1nccn1C	723326	7.275724130399211
709739	COc1cc(OCc2cccc(c2C)-c2ccccc2)cc(OC)c1CNCC1(O)CCCCC1	723327	6.255707016877323
709740	COc1cc(OCc2cccc(c2C)-c2ccccc2)cc(OC)c1CN[C@H]1CCC[C@H]1O	723328	7.275724130399211
709741	COc1cc(OCc2cccc(c2C)-c2ccccc2)cc(OC)c1CNCC1(O)CCN(C)CC1	723329	7.275724130399211
709743	COc1cc(OCc2cccc(c2C)-c2ccccc2)cc(OC)c1CN[C@H]1CCC[C@@H]1O	723331	7.275724130399211
709744	COc1cc(OCc2cccc(c2C)-c2ccccc2)cc(OC)c1CN[C@@H]1CCC[C@H]1O	723332	7.275724130399211
709745	COc1cc(OCc2cccc(c2C)-c2ccccc2)cc(OC)c1CN[C@H](CO)[C@H](C)O	723333	7.275724130399211
709746	COc1cc(OCc2cccc(c2C)-c2ccccc2)cc(OC)c1CN[C@@H](CO)[C@@H](C)O	723334	7.275724130399211
709747	COc1cc(OCc2cccc(c2C)-c2ccccc2)cc(OC)c1CNCC1(O)CCC1	723335	6.255707016877323
709748	COc1cc(OCc2cccc(c2C)-c2ccccc2)cc(OC)c1CNC[C@H](O)CC(O)=O	723336	7.275724130399211
709749	CCC(CO)(CO)NCc1c(OC)cc(OCc2cccc(c2C)-c2ccccc2)cc1OC	723337	7.275724130399211
709750	COc1cc(OCc2cccc(c2C)-c2ccccc2)cc(OC)c1CN[C@H](CO)c1ccccc1	723338	7.275724130399211
709751	COc1cc(OCc2cccc(c2C)-c2ccccc2)cc(OC)c1CN1CCC(O)(CC1)C(N)=O	723339	7.275724130399211
709752	COc1cccc(c1)-c1cccc(COc2cc(OC)c(CNCCNC(C)=O)c(OC)c2)c1C	723340	6.255707016877323
709753	CCOc1cccc(c1)-c1cccc(COc2cc(OC)c(CNCCNC(C)=O)c(OC)c2)c1C	723341	6.255707016877323
709757	CCOc1cccc(c1)-c1cccc(COc2cc(OC)c(CNC(C)(C)CN3CCN(C)CC3)c(OC)c2)c1C	723345	6.255707016877323
709759	COCOc1cccc(c1)-c1cccc(COc2cc(OC)c(CNC(C)(C)CN3CCN(C)CC3)c(OC)c2)c1C	723347	6.255707016877323
709760	COc1cc(OCc2cccc(c2C)-c2cccc(OCC=C)c2)cc(OC)c1CNC(C)(C)CN1CCN(C)CC1	723348	6.255707016877323
709761	COCCOc1ccc(F)c(c1)-c1cccc(COc2cc(OC)c(CNC(C)(C)CN3CCN(C)CC3)c(OC)c2)c1C	723349	6.255707016877323
709762	COc1cc(OCc2cccc(-c3ccccc3)c2C#N)cc(OC)c1CNC[C@@H](O)CC(O)=O	723350	7.275724130399211
806968	COc1cccc(c1F)-c1cccc(COc2cc3OCc4cncc(c4)C(=O)NCCCC[C@H](NCc3cc2Cl)C(O)=O)c1C	822084	7.0
806970	Cc1c(COc2cc3OCc4cncc(c4)C(=O)NCCCC[C@H](NCc3cc2Cl)C(O)=O)cccc1-c1ccccc1F	822086	7.0
806971	Cc1c(COc2cc3OCc4cncc(c4)C(=O)NCCCC[C@H](NCc3cc2Cl)C(O)=O)cccc1-c1cccc(OCCCN2CCC(O)CC2)c1C	822087	7.0
806972	Cc1c(COc2cc3OCc4cncc(c4)C(=O)NCCCC[C@H](NCc3cc2Cl)C(O)=O)cccc1-c1cccc(OCCCCl)c1C	822088	4.989276134608227
806973	Cc1c(COc2cc3OCc4cncc(c4)C(=O)NCCNC(=O)[C@H](CO)NCc3cc2Cl)cccc1-c1ccccc1	822089	6.5228787452803365
806975	Cc1c(COc2cc3OCc4cncc(c4)C(=O)NCCOC[C@H](NCc3cc2Cl)C(O)=O)cccc1-c1ccccc1	822091	6.5228787452803365
806976	Cc1c(COc2cc3OCc4cncc(c4)C(=O)NCC[C@H](NCc3cc2Cl)C(O)=O)cccc1-c1ccccc1	822092	4.989276134608227
806977	Cc1c(COc2cc3OCc4cncc(c4)C(=O)NCCC[C@H](NCc3cc2Cl)C(O)=O)cccc1-c1ccccc1	822093	6.5228787452803365
806978	Cc1c(COc2cc3OCc4cncc(c4)C(=O)NCCCC[C@@H](CC(O)=O)NCc3cc2Cl)cccc1-c1ccccc1	822094	6.5228787452803365
806979	Cc1c(COc2cc3OCCCCC(=O)NCCCC[C@H](NCc3cc2Cl)C(O)=O)cccc1-c1ccccc1	822095	6.5228787452803365
806980	Cc1c(COc2cc-3c(CN[C@@H](CCCCNC(=O)c4cncc-3c4)C(O)=O)cc2Cl)cccc1-c1ccccc1	822096	4.989276134608227
806982	Cc1c(COc2cc3OCc4cncc(c4)C(=O)NCCCC[C@@H](NCc3cc2Cl)C(O)=O)cccc1-c1ccccc1	822098	7.0
806983	Cc1c(COc2cc3OCc4cncc(c4)C(=O)NCCCC[C@H](NCc3cc2Cl)C(O)=O)cccc1-c1ccccc1	822099	7.0
806984	Cc1c(COc2cc3OCc4cncc(c4)C(=O)NCCCC[C@@H](CO)NCc3cc2Cl)cccc1-c1cccc(OCCCN2CCC(O)CC2)c1C	822100	7.0
806985	Cc1c(COc2cc3OCc4cncc(c4)C(=O)NCCCC[C@H](NCc3cc2Cl)C(O)=O)cccc1-c1cccc(OCCCN2CC[C@@H](O)C2)c1C	822101	7.0
806986	Cc1c(COc2cc3OCc4cncc(c4)C(=O)NCCCCCC[C@H](NCc3cc2Cl)C(O)=O)cccc1-c1cccc(OCCCN2CCC(O)CC2)c1C	822102	7.0
806987	Cc1c(COc2cc3OCc4cncc(c4)C(=O)NCCCC[C@H](NCc3cc2Cl)C(O)=O)cccc1-c1cccc(OCCCN2CC(O)C2)c1C	822103	7.0
806988	Cc1c(COc2cc3OCc4cc(cc(c4)C(=O)NCCCC[C@H](NCc3cc2Cl)C(O)=O)C#N)cccc1-c1cccc(OCCCN2CCC(F)CC2)c1C	822104	7.0
806989	Cc1c(COc2cc3OCc4cc(cc(c4)C(=O)NCCCC[C@H](NCc3cc2Cl)C(O)=O)C#N)cccc1-c1cccc(OCCCN2CCC(O)CC2)c1C	822105	7.0
806990	Cc1c(COc2cc3OCc4cc(cc(c4)C(=O)NCCCC[C@H](NCc3cc2Cl)C(O)=O)C#N)cccc1-c1cccc(OCCCN2CC[C@@H](O)C2)c1C	822106	7.0
806991	Cc1c(COc2cc3OCc4cncc(c4)C(=O)NCCCC[C@@H](CO)NCc3cc2Cl)cccc1-c1cccc(OCCCN2CC[C@@H](O)C2)c1C	822107	7.0
806992	Cc1c(COc2cc3OCc4cncc(c4)C(=O)NCCCC[C@@H](CO)NCc3cc2Cl)cccc1-c1cccc(OCCCN2CCC(F)CC2)c1C	822108	7.0
1298080	COc1cc(OCc2cccc(c2C)-c2ccccc2)cc(OC)c1CN1CCCC[C@H]1C(O)=O	50348031	8.221848749616356
1298081	Cc1cc(CN2CCC(CC2)C(=O)NCCO)ccc1OCc1cccc(c1C)-c1ccccc1	50348032	7.958607314841775
1298084	COc1cc(OCc2cccc(-c3ccccc3)c2C#N)cc(OC)c1CN1CCCC[C@H]1C(O)=O	50348035	8.221848749616356
2178128	CC(=O)NCCNCc1cc(C)c(OCc2cccc(c2C)-c2cccc(COc3cc(OCc4cncc(c4)C#N)c(CNCCNC(C)=O)cc3C)c2C)cc1OCc1cncc(c1)C#N	51228399	8.522878745280337
2178130	CC(=O)NCCNCc1cc(C)c(OCc2cccc(c2C)-c2ccccc2)cc1OCc1cncc(c1)C#N	51228401	8.60205999132796
2178131	CCNCc1cc(C)c(OCc2cccc(c2C)-c2ccccc2)cc1OCc1cncc(c1)C#N	51228402	8.657577319177793
2178142	CCNCc1cc(C)c(OCc2cccc(c2C)-c2cccc(COc3cc(OCc4cncc(c4)C#N)c(CNCC)cc3C)c2C)cc1OCc1cncc(c1)C#N	51228413	8.42021640338319
